# Supplementary material for: Photo-oxidation reaction of tert-butyl chloride with OH radicals and Cl atoms in the troposphere and its implications
Source: Royal Society of Chemistry journal article supplement (doi:10.1039/d2cp03503k), 2023-01-01
Supplement: d2cp03503k1.pdf [file d2cp03503k1.pdf]

## Photo-oxidation reaction of *tert*-butyl chloride with OH radicals and Cl atoms in the troposphere and its implications

Fredy Joy<sup>a</sup> and Balla Rajakumar<sup>a,b\*</sup>

<sup>a</sup>Department of Chemistry, Indian Institute of Technology Madras, Chennai-600036, India

<sup>b</sup>Centre for Atmospheric and Climate Sciences, Indian Institute of Technology Madras, Chennai-600036, India

\*Corresponding Email: [rajakumar@iitm.ac.in](mailto:rajakumar@iitm.ac.in)

| Sl. No. | Caption                                                                                                                                                                                                                                              | Page no.  |
|---------|------------------------------------------------------------------------------------------------------------------------------------------------------------------------------------------------------------------------------------------------------|-----------|
| 1       | <b>Table S1:</b> <S2> values for all stationary points optimized at the M062-X/6-31+G(d,p) level for the reaction of TBC with OH radicals.                                                                                                           | S3        |
| 2       | <b>Table S2:</b> <S2> values for all stationary points optimized at the MP2/6-311+G(d,p) level for the reaction of TBC with Cl atoms.                                                                                                                | S3        |
| 2       | <b>Table S3:</b> T1-diagnostic values for all the stationary points involved in the reaction of TBC with OH radicals evaluated at the CCSD(T)/aug-cc-pVTZ//M062-X/6-31+G(d,p) level.                                                                 | S3 – S4   |
| 3       | <b>Table S4:</b> T1-diagnostic values for all the stationary points involved in the reaction of TBC with Cl atoms evaluated at the CCSD(T)/cc-pVDZ//MP2/6-311+G(d,p) level.                                                                          | S4        |
| 4       | <b>Table S5:</b> Values of $k_d$ obtained from 268 – 363 K.                                                                                                                                                                                          | S4 – S5   |
| 5       | <b>Table S6:</b> Pseudo-1st-order rate coefficients for the reaction of TBC with OH radicals measured from 268 – 363 K at various concentrations of TBC.                                                                                             | S5        |
| 6       | <b>Table S7:</b> Optimized geometries in Cartesian Coordinates for the reactants, reactant complexes, transition states, product complexes, and products of the reaction of TBC with OH radicals computed at the M06-2X/6-31+G(d,p) level of theory. | S5 – S11  |
| 7       | <b>Table S8:</b> Vibrational frequencies of the reactants, reactant complexes, transition states, product complexes, and products of the reaction of TBC with OH radicals computed at the M06-2X/6-31+G(d,p) level of theory.                        | S11 – S12 |
| 8       | <b>Table S9:</b> Optimized geometries in Cartesian Coordinates for the                                                                                                                                                                               | S12 – S17 |

|    |                                                                                                                                                                                                                           |           |
|----|---------------------------------------------------------------------------------------------------------------------------------------------------------------------------------------------------------------------------|-----------|
|    | reactants, reactant complexes, transition states, product complexes, and products of the reaction of TBC with Cl atoms computed at the MP2/6-311+G(d,p) level of theory.                                                  |           |
| 9  | <b>Table S10:</b> Vibrational frequencies of the reactants, reactant complexes, transition states, product complexes, and products of the reaction of TBC with Cl atoms computed at the MP2/6-311+G(d,p) level of theory. | S17 – S19 |
| 10 | <b>Table S11:</b> Kinetic branching ratios for the reaction of TBC with OH radicals.                                                                                                                                      | S19       |
| 11 | <b>Table S12:</b> Kinetic branching ratios for the reaction of TBC with Cl atoms.                                                                                                                                         | S19       |
| 12 | <b>Figure S1:</b> Torsional scan of TBC for identifying conformers.                                                                                                                                                       | S20       |
| 13 | <b>Figure S2:</b> IRC plots for the reaction of TBC with OH radicals at the M06-2X/6-31+G(d,p) level of theory.                                                                                                           | S20       |
| 14 | <b>Figure S3:</b> IRC plots for the reaction of TBC with Cl atoms at the MP2/6-311+G(d,p) level of theory.                                                                                                                | S21       |
| 15 | <b>Figure S4:</b> Mass spectra for all the detected products produced in the presence of O <sub>2</sub> .                                                                                                                 | S22 – S23 |

**Table S1:** <S2> values for all stationary points optimized at the M062-X/6-31+G(d,p) level for the reaction of TBC with OH radicals.

| Species          | Before Annihilation | After Annihilation |
|------------------|---------------------|--------------------|
| TBC              | 0.0                 | 0.0                |
| OH               | 0.7528              | 0.7500             |
| RCg              | 0.7530              | 0.7500             |
| RCa              | 0.7531              | 0.7500             |
| TSg              | 0.7590              | 0.7500             |
| TSa              | 0.7590              | 0.7500             |
| PCg              | 0.7565              | 0.7500             |
| PCa              | 0.7562              | 0.7500             |
| P1               | 0.7564              | 0.7500             |
| H <sub>2</sub> O | 0.0                 | 0.0                |

**Table S2:** <S2> values for all stationary points optimized at the MP2/6-311+G(d,p) level for the reaction of TBC with Cl atoms.

| Species | Before Annihilation | After Annihilation |
|---------|---------------------|--------------------|
| TBC     | 0.0                 | 0.0                |
| Cl      | 0.7552              | 0.7500             |
| RCg     | 0.7563              | 0.7500             |
| RCa     | 0.7555              | 0.7500             |
| TSg     | 0.7825              | 0.7505             |
| TSa     | 0.7844              | 0.7506             |
| PCg     | 0.7656              | 0.7502             |
| PCa     | 0.7650              | 0.7502             |
| P1      | 0.7652              | 0.7502             |
| HCl     | 0.0                 | 0.0                |

**Table S3:** T1-diagnostic values for all the stationary points involved in the reaction of TBC with OH radicals evaluated at the CCSD(T)/aug-cc-pVTZ//M062-X/6-31+G(d,p) level.

| Species | T1-diagnostic |
|---------|---------------|
|---------|---------------|

|                  |       |
|------------------|-------|
| TBC              | 0.009 |
| OH               | 0.007 |
| RCg              | 0.010 |
| RCa              | 0.009 |
| TSg              | 0.017 |
| TSa              | 0.017 |
| PCg              | 0.012 |
| PCa              | 0.012 |
| P1               | 0.012 |
| H <sub>2</sub> O | 0.010 |

**Table S4:** T1-diagnostic values for all the stationary points involved in the reaction of TBC with Cl atoms evaluated at the CCSD(T)/cc-pVDZ//MP2/6-311+G(d,p) level.

| Species | T1-diagnostic |
|---------|---------------|
| TBC     | 0.008         |
| Cl      | 0.004         |
| RCg     | 0.009         |
| RCa     | 0.015         |
| TSg     | 0.011         |
| TSa     | 0.012         |
| PCg     | 0.009         |
| PCa     | 0.010         |
| P1      | 0.010         |
| HCl     | 0.004         |

**Table S5:** Values of  $k_d$  obtained from 268 – 363 K.

| Temperature (K) | $k_d$ (s <sup>-1</sup> ) |
|-----------------|--------------------------|
| 268             | 144.3                    |
| 283             | 97.7                     |
| 298             | 164.9                    |
| 323             | 183.0                    |

|     |       |
|-----|-------|
| 343 | 330.6 |
| 363 | 273.3 |

**Table S6:** Pseudo-1st-order rate coefficients for the reaction of TBC with OH radicals measured from 268 – 363 K at various concentrations of TBC.

| 268 K                                                          |                          | 283 K                                                          |                          | 298 K                                                          |                          |
|----------------------------------------------------------------|--------------------------|----------------------------------------------------------------|--------------------------|----------------------------------------------------------------|--------------------------|
| [TBC] ×<br>10 <sup>14</sup><br>(molecule<br>cm <sup>-3</sup> ) | k'<br>(s <sup>-1</sup> ) | [TBC]<br>× 10 <sup>14</sup><br>(molecule<br>cm <sup>-3</sup> ) | k'<br>(s <sup>-1</sup> ) | [TBC] ×<br>10 <sup>14</sup><br>(molecule<br>cm <sup>-3</sup> ) | k'<br>(s <sup>-1</sup> ) |
| 0                                                              | (82.2 ± 13.0)            | 0                                                              | (95.6 ± 9.4)             | 0                                                              | (177.7 ± 8.1)            |
| 3.78                                                           | (372.5 ± 13.2)           | 3.84                                                           | (275.9 ± 12.0)           | 3.76                                                           | (353.5 ± 14.2)           |
| 7.54                                                           | (533.4 ± 31.8)           | 7.50                                                           | (485.1 ± 31.6)           | 7.49                                                           | (557.3 ± 12.9)           |
| 11.28                                                          | (708.9 ± 40.0)           | 11.44                                                          | (649.8 ± 53.8)           | 11.20                                                          | (743.3 ± 27.6)           |
| 14.99                                                          | (838.5 ± 64.6)           | 15.21                                                          | (856.9 ± 38.0)           | 14.90                                                          | (940.3 ± 32.6)           |
| 18.68                                                          | (1015.5 ± 98.4)          | 18.68                                                          | (1018.1 ± 98.8)          | 18.96                                                          | (1175.2 ± 56.6)          |
| 323 K                                                          |                          | 343 K                                                          |                          | 363 K                                                          |                          |
| [TBC] ×<br>10 <sup>14</sup><br>(molecule<br>cm <sup>-3</sup> ) | k'<br>(s <sup>-1</sup> ) | [TBC]<br>× 10 <sup>14</sup><br>(molecule<br>cm <sup>-3</sup> ) | k'<br>(s <sup>-1</sup> ) | [TBC] ×<br>10 <sup>14</sup><br>(molecule<br>cm <sup>-3</sup> ) | k'<br>(s <sup>-1</sup> ) |
| 0                                                              | (178.4 ± 15.6)           | 0                                                              | (323.4 ± 9.8)            | 0                                                              | (272.8 ± 21.0)           |
| 3.74                                                           | (381.6 ± 21.4)           | 4.24                                                           | (649.9 ± 13.1)           | 4.18                                                           | (472.0 ± 19.4)           |
| 7.60                                                           | (609.6 ± 25.0)           | 8.67                                                           | (733.1 ± 14.5)           | 8.34                                                           | (765.6 ± 34.8)           |
| 11.61                                                          | (807.9 ± 21.2)           | 12.97                                                          | (968.2 ± 44.5)           | 12.47                                                          | (991.0 ± 46.4)           |
| 15.12                                                          | (956.4 ± 59.4)           | 17.24                                                          | (1237.4 ± 48.0)          | 16.62                                                          | (1131.4 ± 91.4)          |
| 18.84                                                          | (1208.7 ± 97.0)          | 21.07                                                          | (1529.3 ± 29.3)          | 20.66                                                          | (1420.8 ± 122.2)         |

**Table S7:** Optimized geometries in Cartesian Coordinates for the reactants, reactant complexes, transition states, product complexes, and products of the reaction of TBC with OH radicals computed at the M06-2X/6-31+G(d,p) level of theory.

| <b>TBC</b>    |               |              |              |              |
|---------------|---------------|--------------|--------------|--------------|
| Centre number | Atomic number | Coordinates  |              |              |
|               |               | X            | Y            | Z            |
| 1             | 6             | 0.811023000  | 1.274834000  | -0.699260000 |
| 2             | 6             | 0.355567000  | -0.000006000 | -0.000003000 |
| 3             | 6             | 0.810642000  | -1.243215000 | -0.754268000 |
| 4             | 6             | 0.810363000  | -0.031835000 | 1.453819000  |
| 5             | 1             | 0.446403000  | 2.159929000  | -0.172068000 |
| 6             | 1             | 0.446440000  | 1.306180000  | -1.729021000 |
| 7             | 1             | 1.906304000  | 1.304159000  | -0.715303000 |
| 8             | 1             | 0.446041000  | -1.229302000 | -1.784389000 |
| 9             | 1             | 0.445694000  | -2.150427000 | -0.266365000 |
| 10            | 1             | 1.905904000  | -1.272212000 | -0.771587000 |
| 11            | 1             | 0.445476000  | -0.930885000 | 1.956650000  |
| 12            | 1             | 0.445481000  | 0.844301000  | 1.995617000  |
| 13            | 1             | 1.905622000  | -0.032592000 | 1.487729000  |
| 14            | 17            | -1.477584000 | 0.000128000  | -0.000176000 |

| <b>OH</b>     |               |             |             |              |
|---------------|---------------|-------------|-------------|--------------|
| Centre number | Atomic number | Coordinates |             |              |
|               |               | X           | Y           | Z            |
| 1             | 8             | 0.000000000 | 0.000000000 | 0.108401000  |
| 2             | 1             | 0.000000000 | 0.000000000 | -0.867207000 |

| <b>RCg</b>    |               |              |              |              |
|---------------|---------------|--------------|--------------|--------------|
| Centre number | Atomic number | Coordinates  |              |              |
|               |               | X            | Y            | Z            |
| 1             | 6             | -0.120189000 | -1.046723000 | -1.189419000 |
| 2             | 6             | -0.664895000 | -0.269995000 | 0.001612000  |
| 3             | 6             | -2.161575000 | -0.020445000 | -0.127241000 |
| 4             | 6             | -0.314815000 | -0.943239000 | 1.321494000  |
| 5             | 1             | 0.958025000  | -1.211407000 | -1.100072000 |

|    |    |              |              |              |
|----|----|--------------|--------------|--------------|
| 6  | 1  | -0.320777000 | -0.520878000 | -2.126032000 |
| 7  | 1  | -0.611351000 | -2.025365000 | -1.225831000 |
| 8  | 1  | -2.393143000 | 0.499780000  | -1.059890000 |
| 9  | 1  | -2.531850000 | 0.576513000  | 0.709753000  |
| 10 | 1  | -2.682793000 | -0.983930000 | -0.126111000 |
| 11 | 1  | -0.667628000 | -0.349585000 | 2.168460000  |
| 12 | 1  | 0.764337000  | -1.091212000 | 1.412577000  |
| 13 | 1  | -0.802904000 | -1.923565000 | 1.355951000  |
| 14 | 17 | 0.146534000  | 1.388798000  | -0.003623000 |
| 15 | 8  | 2.868052000  | -0.418351000 | -0.008148000 |
| 16 | 1  | 2.421433000  | 0.449294000  | 0.079295000  |

| <b>RCa</b>    |               |              |              |              |
|---------------|---------------|--------------|--------------|--------------|
| Centre number | Atomic number | Coordinates  |              |              |
|               |               | X            | Y            | Z            |
| 1             | 6             | -0.576953000 | -0.058248000 | -1.167721000 |
| 2             | 6             | 0.340535000  | 0.303298000  | -0.006136000 |
| 3             | 6             | 0.979433000  | 1.671295000  | -0.209337000 |
| 4             | 6             | -0.390020000 | 0.219148000  | 1.327106000  |
| 5             | 1             | -0.996677000 | -1.058604000 | -1.024961000 |
| 6             | 1             | -0.035508000 | -0.038814000 | -2.117155000 |
| 7             | 1             | -1.393962000 | 0.671996000  | -1.213100000 |
| 8             | 1             | 1.530324000  | 1.709782000  | -1.152527000 |
| 9             | 1             | 1.667681000  | 1.903225000  | 0.607161000  |
| 10            | 1             | 0.193323000  | 2.434178000  | -0.230663000 |
| 11            | 1             | 0.287980000  | 0.443999000  | 2.154370000  |
| 12            | 1             | -0.815693000 | -0.775810000 | 1.477752000  |
| 13            | 1             | -1.211611000 | 0.943567000  | 1.332809000  |
| 14            | 17            | 1.693199000  | -0.933636000 | 0.023068000  |
| 15            | 8             | -3.313884000 | -0.303927000 | 0.103128000  |
| 16            | 1             | -3.617147000 | -0.743244000 | -0.714342000 |

| <b>TSg</b>    |               |              |              |              |
|---------------|---------------|--------------|--------------|--------------|
| Centre number | Atomic number | Coordinates  |              |              |
|               |               | X            | Y            | Z            |
| 1             | 6             | 0.446600000  | -0.964269000 | -0.951376000 |
| 2             | 6             | -0.543846000 | -0.324997000 | 0.000012000  |
| 3             | 6             | -1.974806000 | -0.509584000 | -0.497539000 |
| 4             | 6             | -0.369285000 | -0.836971000 | 1.423831000  |
| 5             | 1             | 1.557169000  | -0.761247000 | -0.560351000 |
| 6             | 1             | 0.401170000  | -0.557651000 | -1.963358000 |
| 7             | 1             | 0.355773000  | -2.054813000 | -0.952729000 |
| 8             | 1             | -2.096736000 | -0.099420000 | -1.502760000 |
| 9             | 1             | -2.680095000 | -0.012522000 | 0.173394000  |
| 10            | 1             | -2.210047000 | -1.578897000 | -0.522630000 |
| 11            | 1             | -1.057029000 | -0.328576000 | 2.103632000  |
| 12            | 1             | 0.656465000  | -0.685360000 | 1.767459000  |
| 13            | 1             | -0.587746000 | -1.910341000 | 1.443748000  |
| 14            | 17            | -0.204172000 | 1.480388000  | 0.011141000  |
| 15            | 8             | 2.674679000  | -0.254714000 | -0.009489000 |
| 16            | 1             | 2.382595000  | 0.674870000  | 0.050543000  |

| <b>TSa</b>    |               |              |              |              |
|---------------|---------------|--------------|--------------|--------------|
| Centre number | Atomic number | Coordinates  |              |              |
|               |               | X            | Y            | Z            |
| 1             | 6             | 0.616820000  | -1.117513000 | 0.038021000  |
| 2             | 6             | -0.215462000 | 0.148723000  | -0.003387000 |
| 3             | 6             | 0.018829000  | 1.006019000  | 1.232508000  |
| 4             | 6             | 0.026335000  | 0.930174000  | -1.287148000 |
| 5             | 1             | 0.491437000  | -1.742609000 | -0.848431000 |
| 6             | 1             | 0.479957000  | -1.691900000 | 0.956500000  |
| 7             | 1             | 1.724008000  | -0.733113000 | 0.038640000  |
| 8             | 1             | -0.199821000 | 0.444249000  | 2.144119000  |



|    |    |              |              |              |
|----|----|--------------|--------------|--------------|
| 9  | 1  | -0.614469000 | 1.896053000  | 1.209157000  |
| 10 | 1  | 1.069423000  | 1.314502000  | 1.252246000  |
| 11 | 1  | -0.606614000 | 1.820143000  | -1.320549000 |
| 12 | 1  | -0.188106000 | 0.314834000  | -2.164588000 |
| 13 | 1  | 1.077277000  | 1.236199000  | -1.319182000 |
| 14 | 17 | -1.969810000 | -0.392728000 | 0.007432000  |
| 15 | 8  | 3.004372000  | -0.130614000 | 0.013491000  |
| 16 | 1  | 3.539564000  | -0.941480000 | -0.062143000 |

| <b>PCg</b>    |               |              |              |              |
|---------------|---------------|--------------|--------------|--------------|
| Centre number | Atomic number | Coordinates  |              |              |
|               |               | X            | Y            | Z            |
| 1             | 6             | 0.133693000  | -0.927719000 | 1.279517000  |
| 2             | 6             | 0.707232000  | -0.352415000 | 0.054111000  |
| 3             | 6             | 2.216199000  | -0.171947000 | 0.125481000  |
| 4             | 6             | 0.259956000  | -1.077413000 | -1.206835000 |
| 5             | 1             | -2.244997000 | 0.458872000  | 0.049022000  |
| 6             | 1             | 0.608576000  | -0.735085000 | 2.234768000  |
| 7             | 1             | -0.860404000 | -1.359178000 | 1.255200000  |
| 8             | 1             | 2.500592000  | 0.403758000  | 1.009349000  |
| 9             | 1             | 2.588041000  | 0.341220000  | -0.764299000 |
| 10            | 1             | 2.684547000  | -1.160324000 | 0.184022000  |
| 11            | 1             | 0.614202000  | -0.554975000 | -2.098764000 |
| 12            | 1             | -0.828768000 | -1.161331000 | -1.241253000 |
| 13            | 1             | 0.689642000  | -2.085221000 | -1.195901000 |
| 14            | 17            | 0.000438000  | 1.417315000  | -0.081649000 |
| 15            | 8             | -2.748571000 | -0.367183000 | 0.061924000  |
| 16            | 1             | -3.672791000 | -0.127663000 | -0.053144000 |

| <b>PCa</b>    |               |             |   |   |
|---------------|---------------|-------------|---|---|
| Centre number | Atomic number | Coordinates |   |   |
|               |               | X           | Y | Z |

|    |    |              |              |              |
|----|----|--------------|--------------|--------------|
| 1  | 6  | -0.265691000 | 0.000282000  | 1.366432000  |
| 2  | 6  | 0.234904000  | -0.000002000 | -0.025696000 |
| 3  | 6  | -0.144145000 | -1.262854000 | -0.786387000 |
| 4  | 6  | -0.144109000 | 1.262561000  | -0.786884000 |
| 5  | 1  | -0.296778000 | 0.932239000  | 1.921017000  |
| 6  | 1  | -0.297038000 | -0.931490000 | 1.921312000  |
| 7  | 1  | -2.713813000 | 0.000474000  | 0.892223000  |
| 8  | 1  | 0.168039000  | -2.155947000 | -0.238970000 |
| 9  | 1  | 0.333035000  | -1.271827000 | -1.769209000 |
| 10 | 1  | -1.231354000 | -1.277472000 | -0.915117000 |
| 11 | 1  | 0.333116000  | 1.271159000  | -1.769687000 |
| 12 | 1  | 0.168051000  | 2.155865000  | -0.239798000 |
| 13 | 1  | -1.231312000 | 1.277126000  | -0.915670000 |
| 14 | 17 | 2.104627000  | 0.000010000  | 0.128453000  |
| 15 | 8  | -3.127235000 | -0.000062000 | 0.020012000  |
| 16 | 1  | -4.078468000 | 0.000270000  | 0.165308000  |

| <b>P1</b>     |               |             |              |              |
|---------------|---------------|-------------|--------------|--------------|
| Centre number | Atomic number | Coordinates |              |              |
|               |               | X           | Y            | Z            |
| 1             | 6             | 0.727103000 | 0.000000000  | 1.505146000  |
| 2             | 6             | 0.407165000 | 0.000000000  | 0.065288000  |
| 3             | 6             | 0.883360000 | 1.263900000  | -0.638591000 |
| 4             | 6             | 0.883360000 | -1.263900000 | -0.638591000 |
| 5             | 1             | 0.727976000 | -0.932219000 | 2.057677000  |
| 6             | 1             | 0.727976000 | 0.932219000  | 2.057677000  |
| 7             | 1             | 0.490281000 | 2.155805000  | -0.145055000 |
| 8             | 1             | 0.559352000 | 1.269602000  | -1.681900000 |
| 9             | 1             | 1.977667000 | 1.297806000  | -0.607536000 |
| 10            | 1             | 0.559352000 | -1.269602000 | -1.681900000 |
| 11            | 1             | 0.490281000 | -2.155805000 | -0.145055000 |

|    |    |              |              |              |
|----|----|--------------|--------------|--------------|
| 12 | 1  | 1.977667000  | -1.297806000 | -0.607536000 |
| 13 | 17 | -1.465675000 | 0.000000000  | -0.059170000 |

| <b>H<sub>2</sub>O</b> |               |             |              |              |
|-----------------------|---------------|-------------|--------------|--------------|
| Centre number         | Atomic number | Coordinates |              |              |
|                       |               | X           | Y            | Z            |
| 1                     | 1             | 0.000000000 | 0.768653000  | -0.462418000 |
| 2                     | 8             | 0.000000000 | 0.000000000  | 0.115605000  |
| 3                     | 1             | 0.000000000 | -0.768653000 | -0.462418000 |

**Table S8:** Vibrational frequencies of the reactants, reactant complexes, transition states, product complexes, and products of the reaction of TBC with OH radicals computed at the M06-2X/6-31+G(d,p) level of theory. i denotes imaginary frequency and frequencies treated as hindered rotors are shown in bold.

| <b>TBC</b>   | <b>OH</b> | <b>RCg</b> | <b>RCa</b> | <b>TSg</b>   | <b>TSa</b>   | <b>PCg</b> | <b>PCa</b> | <b>P1</b> | <b>H<sub>2</sub>O</b> |
|--------------|-----------|------------|------------|--------------|--------------|------------|------------|-----------|-----------------------|
| <b>236.1</b> | 3781.5    | 57.5       | 35.2       | 1110.5i      | 774.0i       | 62.2       | 77.7       | 241.3     | 1598.5                |
| <b>296.1</b> |           | 78.6       | 73.1       | <b>86.8</b>  | 60.1         | 94.9       | 93.2       | 265.1     | 3882.5                |
| <b>297.5</b> |           | 119.8      | 94.6       | 117.5        | <b>80.5</b>  | 107.7      | 124.4      | 281.6     | 4007.2                |
| 306.3        |           | 229.5      | 106.2      | <b>248.8</b> | 83.9         | 134.4      | 134.6      | 295.1     |                       |
| 306.5        |           | 274.6      | 224.3      | 277.4        | <b>251.5</b> | 246.8      | 150.7      | 302.2     |                       |
| 379.3        |           | 285.5      | 248.3      | <b>288.7</b> | 272.1        | 258.2      | 199.4      | 360.7     |                       |
| 412.4        |           | 297.2      | 297.9      | 294.8        | <b>298.3</b> | 282.1      | 277.4      | 407.3     |                       |
| 412.6        |           | 303.5      | 304.9      | 309.9        | 301.1        | 293.1      | 295.0      | 412.8     |                       |
| 594.5        |           | 309.4      | 310.9      | 362.9        | 367.4        | 296.5      | 306.1      | 519.9     |                       |
| 842.5        |           | 318.5      | 324.0      | 376.2        | 379.9        | 314.1      | 310.2      | 629.5     |                       |
| 947.7        |           | 379.5      | 380.7      | 412.1        | 408.8        | 350.6      | 335.1      | 829.8     |                       |
| 947.8        |           | 410.7      | 414.1      | 431.0        | 417.0        | 358.5      | 371.4      | 937.2     |                       |
| 974.6        |           | 418.1      | 415.4      | 583.5        | 580.6        | 406.7      | 408.1      | 968.5     |                       |
| 1056.5       |           | 577.7      | 591.9      | 768.4        | 707.7        | 424.2      | 413.6      | 1017.2    |                       |
| 1056.9       |           | 837.3      | 843.0      | 843.6        | 840.0        | 476.2      | 535.0      | 1044.5    |                       |
| 1191.2       |           | 947.1      | 946.8      | 917.7        | 948.7        | 664.8      | 686.9      | 1126.0    |                       |

|        |  |        |        |        |        |        |        |        |  |
|--------|--|--------|--------|--------|--------|--------|--------|--------|--|
| 1277.2 |  | 948.2  | 951.6  | 947.0  | 966.2  | 823.2  | 828.1  | 1281.2 |  |
| 1277.5 |  | 976.6  | 976.2  | 959.4  | 976.0  | 944.3  | 941.7  | 1306.8 |  |
| 1410.2 |  | 1056.8 | 1056.9 | 992.8  | 1024.7 | 978.0  | 973.9  | 1410.1 |  |
| 1410.5 |  | 1058.5 | 1060.5 | 1052.8 | 1057.6 | 1024.1 | 1020.5 | 1424.4 |  |
| 1436.6 |  | 1184.8 | 1191.5 | 1088.0 | 1144.5 | 1046.9 | 1053.8 | 1473.2 |  |
| 1476.0 |  | 1278.0 | 1276.0 | 1200.3 | 1266.8 | 1121.9 | 1135.9 | 1484.2 |  |
| 1490.3 |  | 1279.5 | 1278.2 | 1253.4 | 1274.0 | 1289.7 | 1283.2 | 1489.8 |  |
| 1490.8 |  | 1412.0 | 1407.7 | 1278.8 | 1321.0 | 1314.4 | 1304.9 | 1503.2 |  |
| 1504.7 |  | 1413.7 | 1411.7 | 1322.1 | 1329.3 | 1411.6 | 1412.9 | 1514.0 |  |
| 1504.8 |  | 1439.2 | 1436.8 | 1408.3 | 1371.6 | 1426.9 | 1427.8 | 3070.3 |  |
| 1523.1 |  | 1475.1 | 1475.1 | 1423.6 | 1413.4 | 1477.4 | 1469.4 | 3074.1 |  |
| 3066.8 |  | 1485.1 | 1488.2 | 1435.9 | 1429.2 | 1486.4 | 1487.7 | 3151.0 |  |
| 3066.9 |  | 1491.4 | 1489.8 | 1458.8 | 1472.6 | 1491.4 | 1496.4 | 3154.2 |  |
| 3073.2 |  | 1504.8 | 1502.1 | 1488.2 | 1488.6 | 1504.9 | 1511.8 | 3170.5 |  |
| 3146.0 |  | 1505.7 | 1509.1 | 1490.6 | 1490.4 | 1518.2 | 1516.5 | 3172.5 |  |
| 3146.1 |  | 1520.7 | 1521.4 | 1504.1 | 1507.3 | 1605.1 | 1590.4 | 3187.5 |  |
| 3151.8 |  | 3064.6 | 3057.7 | 1513.7 | 1517.6 | 3068.7 | 3072.7 | 3299.5 |  |
| 3165.7 |  | 3068.4 | 3067.8 | 3069.6 | 3071.7 | 3073.5 | 3076.1 |        |  |
| 3168.5 |  | 3073.6 | 3074.0 | 3073.2 | 3075.1 | 3149.0 | 3159.0 |        |  |
| 3168.7 |  | 3141.3 | 3133.0 | 3102.9 | 3116.7 | 3153.6 | 3161.8 |        |  |
|        |  | 3147.9 | 3147.3 | 3150.1 | 3154.8 | 3172.3 | 3166.3 |        |  |
|        |  | 3152.5 | 3153.2 | 3153.9 | 3157.8 | 3176.4 | 3168.8 |        |  |
|        |  | 3162.9 | 3157.1 | 3169.4 | 3167.1 | 3184.0 | 3173.2 |        |  |
|        |  | 3168.4 | 3166.5 | 3176.8 | 3169.6 | 3301.1 | 3284.3 |        |  |
|        |  | 3169.9 | 3169.7 | 3186.6 | 3193.6 | 3823.5 | 3846.1 |        |  |
|        |  | 3715.6 | 3769.8 | 3763.7 | 3792.9 | 3977.6 | 3982.5 |        |  |

**Table S9:** Optimized geometries in Cartesian Coordinates for the reactants, reactant complexes, transition states, product complexes, and products of the reaction of TBC with Cl atoms computed at the MP2/6-311+G(d,p) level of theory.

| TBC    |        |             |
|--------|--------|-------------|
| Centre | Atomic | Coordinates |

| number | number | X            | Y            | Z            |
|--------|--------|--------------|--------------|--------------|
| 1      | 6      | -0.805613000 | -1.266398000 | 0.710750000  |
| 2      | 6      | -0.345224000 | 0.000000000  | 0.000001000  |
| 3      | 6      | -0.805617000 | 0.017670000  | -1.452106000 |
| 4      | 6      | -0.805616000 | 1.248726000  | 0.741357000  |
| 5      | 1      | -0.439595000 | -1.287290000 | 1.740725000  |
| 6      | 1      | -0.439605000 | -2.156467000 | 0.192032000  |
| 7      | 1      | -1.901208000 | -1.294424000 | 0.726486000  |
| 8      | 1      | -0.439617000 | -0.863880000 | -1.985179000 |
| 9      | 1      | -0.439593000 | 0.911916000  | -1.963579000 |
| 10     | 1      | -1.901212000 | 0.018076000  | -1.484242000 |
| 11     | 1      | -0.439606000 | 2.151155000  | 0.244454000  |
| 12     | 1      | -0.439602000 | 1.244547000  | 1.771536000  |
| 13     | 1      | -1.901211000 | 1.276361000  | 0.757766000  |
| 14     | 17     | 1.465510000  | 0.000001000  | -0.000001000 |

| <b>RCg</b>    |               |              |              |              |
|---------------|---------------|--------------|--------------|--------------|
| Centre number | Atomic number | Coordinates  |              |              |
|               |               | X            | Y            | Z            |
| 1             | 6             | -0.857151000 | -1.020296000 | -1.258051000 |
| 2             | 6             | -1.150704000 | -0.213892000 | 0.000010000  |
| 3             | 6             | -2.578394000 | 0.317043000  | -0.000021000 |
| 4             | 6             | -0.857157000 | -1.020270000 | 1.258080000  |
| 5             | 1             | 0.177222000  | -1.372301000 | -1.263226000 |
| 6             | 1             | -1.027714000 | -0.417640000 | -2.154011000 |
| 7             | 1             | -1.523426000 | -1.889863000 | -1.288083000 |
| 8             | 1             | -2.766359000 | 0.925774000  | -0.888314000 |
| 9             | 1             | -2.766423000 | 0.925739000  | 0.888285000  |
| 10            | 1             | -3.274840000 | -0.529012000 | -0.000057000 |
| 11            | 1             | -1.027559000 | -0.417577000 | 2.154046000  |
| 12            | 1             | 0.177204000  | -1.372325000 | 1.263156000  |
| 13            | 1             | -1.523439000 | -1.889826000 | 1.288196000  |

|    |    |              |              |              |
|----|----|--------------|--------------|--------------|
| 14 | 17 | -0.044781000 | 1.227776000  | 0.000001000  |
| 15 | 17 | 2.763356000  | -0.188863000 | -0.000007000 |

| <b>RCa</b>    |               |              |              |              |
|---------------|---------------|--------------|--------------|--------------|
| Centre number | Atomic number | Coordinates  |              |              |
|               |               | X            | Y            | Z            |
| 1             | 6             | -0.364305000 | -1.249764000 | -0.704892000 |
| 2             | 6             | -0.852524000 | -0.000203000 | 0.016915000  |
| 3             | 6             | -0.447146000 | -0.017598000 | 1.485305000  |
| 4             | 6             | -0.364278000 | 1.266088000  | -0.675118000 |
| 5             | 1             | -0.686229000 | -1.243763000 | -1.749687000 |
| 6             | 1             | -0.754790000 | -2.151068000 | -0.224969000 |
| 7             | 1             | 0.729998000  | -1.280461000 | -0.671627000 |
| 8             | 1             | -0.832303000 | -0.911567000 | 1.982923000  |
| 9             | 1             | -0.832316000 | 0.864322000  | 2.003964000  |
| 10            | 1             | 0.646080000  | -0.018432000 | 1.555928000  |
| 11            | 1             | -0.754672000 | 2.155794000  | -0.173956000 |
| 12            | 1             | -0.686263000 | 1.284860000  | -1.719743000 |
| 13            | 1             | 0.730027000  | 1.295926000  | -0.641228000 |
| 14            | 17            | -2.663042000 | 0.000634000  | -0.052316000 |
| 15            | 17            | 3.522452000  | 0.000146000  | -0.012088000 |

| <b>TSg</b>    |               |              |              |              |
|---------------|---------------|--------------|--------------|--------------|
| Centre number | Atomic number | Coordinates  |              |              |
|               |               | X            | Y            | Z            |
| 1             | 6             | 0.147017000  | -0.776739000 | -0.984963000 |
| 2             | 6             | -0.902835000 | -0.340765000 | -0.000186000 |
| 3             | 6             | -2.271172000 | -0.838134000 | -0.480447000 |
| 4             | 6             | -0.606323000 | -0.830949000 | 1.412802000  |
| 5             | 1             | 1.373313000  | -0.337861000 | -0.505351000 |
| 6             | 1             | 0.132908000  | -0.284977000 | -1.956918000 |
| 7             | 1             | 0.328741000  | -1.852281000 | -1.015305000 |

|    |    |              |              |              |
|----|----|--------------|--------------|--------------|
| 8  | 1  | -2.493409000 | -0.464338000 | -1.482881000 |
| 9  | 1  | -3.047654000 | -0.486513000 | 0.204760000  |
| 10 | 1  | -2.280901000 | -1.933159000 | -0.494347000 |
| 11 | 1  | -1.405171000 | -0.519406000 | 2.090159000  |
| 12 | 1  | 0.341523000  | -0.428556000 | 1.774920000  |
| 13 | 1  | -0.549883000 | -1.925276000 | 1.413087000  |
| 14 | 17 | -0.946976000 | 1.460572000  | 0.018138000  |
| 15 | 17 | 2.676412000  | 0.007186000  | -0.001159000 |

| <b>TSa</b>    |               |              |              |              |
|---------------|---------------|--------------|--------------|--------------|
| Centre number | Atomic number | Coordinates  |              |              |
|               |               | X            | Y            | Z            |
| 1             | 6             | 0.198355000  | -1.065419000 | -0.000075000 |
| 2             | 6             | -0.645942000 | 0.177339000  | 0.000001000  |
| 3             | 6             | -0.455903000 | 1.006346000  | 1.261873000  |
| 4             | 6             | -0.455936000 | 1.006475000  | -1.261790000 |
| 5             | 1             | 0.184170000  | -1.652755000 | -0.918087000 |
| 6             | 1             | 0.184154000  | -1.652878000 | 0.917856000  |
| 7             | 1             | 1.497367000  | -0.616470000 | -0.000031000 |
| 8             | 1             | -0.622113000 | 0.398774000  | 2.155207000  |
| 9             | 1             | -1.159025000 | 1.842676000  | 1.271014000  |
| 10            | 1             | 0.564738000  | 1.401185000  | 1.285243000  |
| 11            | 1             | -1.158981000 | 1.842872000  | -1.270774000 |
| 12            | 1             | -0.622278000 | 0.399024000  | -2.155181000 |
| 13            | 1             | 0.564740000  | 1.401224000  | -1.285201000 |
| 14            | 17            | -2.351823000 | -0.463993000 | -0.000005000 |
| 15            | 17            | 2.864987000  | -0.130836000 | -0.000001000 |

| <b>PCg</b>    |               |              |              |              |
|---------------|---------------|--------------|--------------|--------------|
| Centre number | Atomic number | Coordinates  |              |              |
|               |               | X            | Y            | Z            |
| 1             | 6             | -0.714846000 | -0.917898000 | -1.318722000 |

|    |    |              |              |              |
|----|----|--------------|--------------|--------------|
| 2  | 6  | -1.211864000 | -0.323045000 | -0.056914000 |
| 3  | 6  | -2.715634000 | -0.083143000 | -0.084014000 |
| 4  | 6  | -0.782074000 | -1.121165000 | 1.167055000  |
| 5  | 1  | 1.895264000  | 0.563298000  | 0.003927000  |
| 6  | 1  | -1.168675000 | -0.634419000 | -2.261155000 |
| 7  | 1  | 0.228302000  | -1.451313000 | -1.331546000 |
| 8  | 1  | -2.995279000 | 0.530817000  | -0.943705000 |
| 9  | 1  | -3.040496000 | 0.421503000  | 0.829361000  |
| 10 | 1  | -3.227851000 | -1.048348000 | -0.157658000 |
| 11 | 1  | -1.088249000 | -0.612273000 | 2.084459000  |
| 12 | 1  | 0.301048000  | -1.261750000 | 1.184992000  |
| 13 | 1  | -1.260895000 | -2.105615000 | 1.131588000  |
| 14 | 17 | -0.428566000 | 1.351465000  | 0.093465000  |
| 15 | 17 | 2.952292000  | -0.159135000 | -0.021976000 |

| <b>PCa</b>    |               |              |              |              |
|---------------|---------------|--------------|--------------|--------------|
| Centre number | Atomic number | Coordinates  |              |              |
|               |               | X            | Y            | Z            |
| 1             | 6             | -0.082160000 | 0.001599000  | -1.230106000 |
| 2             | 6             | -0.767466000 | -0.000143000 | 0.088414000  |
| 3             | 6             | -0.480773000 | -1.263497000 | 0.890035000  |
| 4             | 6             | -0.480657000 | 1.261019000  | 0.893438000  |
| 5             | 1             | -0.000194000 | 0.933554000  | -1.780832000 |
| 6             | 1             | -0.000235000 | -0.928889000 | -1.783314000 |
| 7             | 1             | 2.084138000  | 0.000854000  | -0.660919000 |
| 8             | 1             | -0.721183000 | -2.155877000 | 0.306603000  |
| 9             | 1             | -1.076662000 | -1.273502000 | 1.805995000  |
| 10            | 1             | 0.579847000  | -1.290280000 | 1.160993000  |
| 11            | 1             | -1.076567000 | 1.268621000  | 1.809407000  |
| 12            | 1             | -0.720961000 | 2.154992000  | 0.312404000  |
| 13            | 1             | 0.579959000  | 1.286962000  | 1.164492000  |
| 14            | 17            | -2.562474000 | 0.000464000  | -0.297366000 |



|    |    |             |             |              |
|----|----|-------------|-------------|--------------|
| 15 | 17 | 3.222368000 | 0.000106000 | -0.066488000 |
|----|----|-------------|-------------|--------------|

| <b>P1</b>     |               |              |              |              |
|---------------|---------------|--------------|--------------|--------------|
| Centre number | Atomic number | Coordinates  |              |              |
|               |               | X            | Y            | Z            |
| 1             | 6             | 0.713290000  | 0.000000000  | 1.510301000  |
| 2             | 6             | 0.389063000  | 0.000000000  | 0.063645000  |
| 3             | 6             | 0.879745000  | 1.261882000  | -0.635028000 |
| 4             | 6             | 0.879745000  | -1.261882000 | -0.635028000 |
| 5             | 1             | 0.694660000  | -0.932009000 | 2.063475000  |
| 6             | 1             | 0.694660000  | 0.932009000  | 2.063475000  |
| 7             | 1             | 0.481665000  | 2.154359000  | -0.145699000 |
| 8             | 1             | 0.564736000  | 1.266623000  | -1.681618000 |
| 9             | 1             | 1.973873000  | 1.293624000  | -0.593034000 |
| 10            | 1             | 0.564736000  | -1.266623000 | -1.681618000 |
| 11            | 1             | 0.481665000  | -2.154359000 | -0.145699000 |
| 12            | 1             | 1.973873000  | -1.293624000 | -0.593034000 |
| 13            | 17            | -1.447113000 | 0.000000000  | -0.065270000 |

| <b>HCl</b>    |               |             |             |              |
|---------------|---------------|-------------|-------------|--------------|
| Centre number | Atomic number | Coordinates |             |              |
|               |               | X           | Y           | Z            |
| 1             | 1             | 0.000000000 | 0.000000000 | -1.202131000 |
| 2             | 17            | 0.000000000 | 0.000000000 | 0.070714000  |

**Table S10:** Vibrational frequencies of the reactants, reactant complexes, transition states, product complexes, and products of the reaction of TBC with Cl atoms computed at the MP2/6-311+G(d,p) level of theory. i denotes imaginary frequency and frequencies treated as hindered rotors are shown in bold.

| <b>TBC</b>   | <b>RCg</b> | <b>RCa</b> | <b>TSg</b> | <b>TSa</b> | <b>PCg</b> | <b>PCa</b> | <b>P1</b> | <b>HCl</b> |
|--------------|------------|------------|------------|------------|------------|------------|-----------|------------|
| <b>235.7</b> | 33.6       | 18.9       | 1121.2i    | 1069.2i    | 34.6       | 36.7       | 222.9     | 3089.2     |

|              |        |        |              |              |        |        |        |  |
|--------------|--------|--------|--------------|--------------|--------|--------|--------|--|
| <b>301.2</b> | 57.6   | 26.1   | 56.4         | 66.1         | 52.7   | 51.4   | 269.3  |  |
| <b>301.2</b> | 69.8   | 48.3   | 94.2         | 96.2         | 82.6   | 72.4   | 280.7  |  |
| 310.1        | 227.5  | 229.6  | <b>243.7</b> | 233.4        | 218.9  | 225.3  | 307.1  |  |
| 310.1        | 290.7  | 268.1  | 272.0        | <b>246.1</b> | 264.9  | 266.9  | 307.8  |  |
| 380.3        | 297.4  | 296.9  | <b>295.1</b> | <b>291.2</b> | 283.5  | 289.6  | 365.0  |  |
| 409.8        | 309.4  | 307.3  | 308.0        | 303.2        | 291.4  | 300.0  | 405.6  |  |
| 409.8        | 310.6  | 307.5  | 361.5        | 360.7        | 306.5  | 303.5  | 411.4  |  |
| 620.9        | 379.7  | 379.8  | 386.9        | 399.3        | 306.9  | 341.2  | 582.7  |  |
| 858.6        | 408.8  | 404.5  | <b>403.4</b> | 403.6        | 352.1  | 348.8  | 641.9  |  |
| 955.6        | 411.4  | 409.4  | 420.0        | <b>437.2</b> | 366.8  | 372.2  | 847.5  |  |
| 955.6        | 613.2  | 619.1  | 526.5        | 528.0        | 405.2  | 405.3  | 946.2  |  |
| 980.5        | 854.7  | 858.1  | 626.8        | 625.2        | 414.2  | 412.1  | 976.0  |  |
| 1066.1       | 955.2  | 946.9  | 861.3        | 844.8        | 562.3  | 600.1  | 1024.6 |  |
| 1066.1       | 955.9  | 954.6  | 886.7        | 880.6        | 633.3  | 734.7  | 1053.9 |  |
| 1209.8       | 981.2  | 980.4  | 930.6        | 937.7        | 842.8  | 846.2  | 1146.1 |  |
| 1282.5       | 1066.0 | 1051.8 | 963.5        | 970.2        | 947.6  | 946.1  | 1286.6 |  |
| 1282.5       | 1066.0 | 1065.8 | 971.0        | 999.3        | 977.5  | 976.6  | 1308.8 |  |
| 1414.7       | 1206.0 | 1210.2 | 1019.8       | 1031.4       | 1025.1 | 1025.3 | 1414.7 |  |
| 1414.7       | 1283.4 | 1278.5 | 1061.0       | 1063.2       | 1053.9 | 1056.5 | 1430.2 |  |
| 1442.1       | 1283.6 | 1282.8 | 1164.1       | 1145.8       | 1142.2 | 1148.4 | 1486.8 |  |
| 1483.8       | 1415.1 | 1412.4 | 1205.5       | 1211.2       | 1289.4 | 1288.1 | 1492.3 |  |
| 1493.5       | 1415.5 | 1413.2 | 1251.8       | 1294.4       | 1310.7 | 1305.2 | 1496.3 |  |
| 1493.5       | 1442.8 | 1440.3 | 1281.8       | 1298.4       | 1416.5 | 1417.5 | 1510.5 |  |
| 1512.6       | 1482.7 | 1449.1 | 1408.6       | 1418.6       | 1432.2 | 1433.4 | 1519.8 |  |
| 1512.6       | 1493.6 | 1486.2 | 1429.3       | 1434.3       | 1489.4 | 1483.1 | 3069.6 |  |
| 1524.7       | 1493.9 | 1492.2 | 1469.9       | 1474.5       | 1493.0 | 1491.9 | 3072.9 |  |
| 3065.1       | 1511.7 | 1495.6 | 1490.7       | 1492.2       | 1496.1 | 1497.2 | 3161.1 |  |
| 3065.1       | 1512.7 | 1509.2 | 1493.5       | 1496.6       | 1510.7 | 1512.8 | 3164.7 |  |
| 3070.6       | 1525.3 | 1523.9 | 1508.9       | 1513.2       | 1520.9 | 1519.0 | 3176.9 |  |
| 3154.9       | 3067.3 | 3068.3 | 1517.3       | 1519.3       | 2981.8 | 2913.0 | 3179.3 |  |
| 3154.9       | 3068.0 | 3069.7 | 3069.2       | 3075.0       | 3072.0 | 3072.7 | 3191.4 |  |
| 3160.9       | 3073.1 | 3074.1 | 3074.1       | 3077.9       | 3075.3 | 3075.7 | 3311.5 |  |

|        |        |        |        |        |        |        |  |  |
|--------|--------|--------|--------|--------|--------|--------|--|--|
| 3171.5 | 3157.2 | 3159.2 | 3132.1 | 3138.4 | 3163.1 | 3165.1 |  |  |
| 3175.2 | 3157.7 | 3160.4 | 3162.2 | 3169.0 | 3166.8 | 3168.4 |  |  |
| 3175.2 | 3163.3 | 3166.3 | 3166.5 | 3172.3 | 3179.4 | 3175.8 |  |  |
|        | 3175.0 | 3171.2 | 3177.6 | 3178.4 | 3184.1 | 3177.9 |  |  |
|        | 3178.8 | 3174.7 | 3190.7 | 3181.1 | 3194.6 | 3180.4 |  |  |
|        | 3180.7 | 3174.7 | 3240.7 | 3244.2 | 3316.4 | 3295.1 |  |  |

**Table S11:** Kinetic branching ratios ( $\Gamma$ ) for the reaction of TBC with OH radicals.

| <b>T(K)</b> | <b><math>\Gamma_{TSg}</math> (%)</b> | <b><math>\Gamma_{TSa}</math> (%)</b> |
|-------------|--------------------------------------|--------------------------------------|
| 200         | 38.18                                | 61.82                                |
| 225         | 34.25                                | 65.75                                |
| 250         | 31.28                                | 68.72                                |
| 275         | 28.78                                | 71.22                                |
| 298         | 27.01                                | 72.99                                |
| 300         | 26.83                                | 73.17                                |
| 325         | 25.28                                | 74.72                                |
| 350         | 23.96                                | 76.04                                |
| 375         | 22.74                                | 77.26                                |
| 400         | 21.90                                | 78.10                                |

**Table S12:** Kinetic branching ratios ( $\Gamma$ ) for the reaction of TBC with Cl atoms.

| <b>T(K)</b> | <b><math>\Gamma_{TSg}</math> (%)</b> | <b><math>\Gamma_{TSa}</math> (%)</b> |
|-------------|--------------------------------------|--------------------------------------|
| 200         | 42.71                                | 57.29                                |
| 225         | 45.10                                | 54.90                                |
| 250         | 47.11                                | 52.89                                |
| 275         | 48.78                                | 51.22                                |
| 298         | 50.10                                | 49.90                                |
| 300         | 50.20                                | 49.80                                |
| 325         | 51.27                                | 48.73                                |
| 350         | 52.46                                | 47.54                                |
| 375         | 53.33                                | 46.67                                |

|     |       |       |
|-----|-------|-------|
| 400 | 54.10 | 45.90 |
|-----|-------|-------|

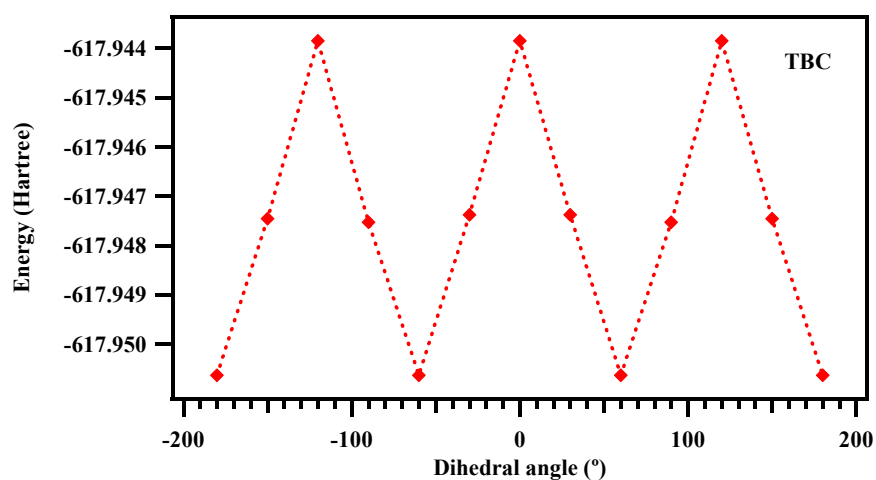

**Figure S1:** Torsional scan of TBC for identifying conformers.

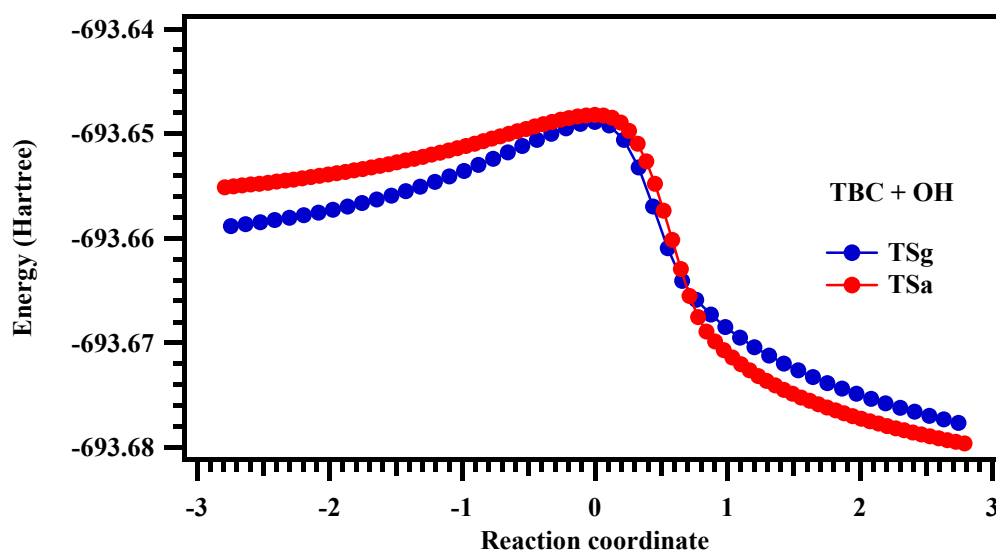

**Figure S2:** IRC plots for the reaction of TBC with OH radicals at the M06-2X/6-31+G(d,p) level of theory.

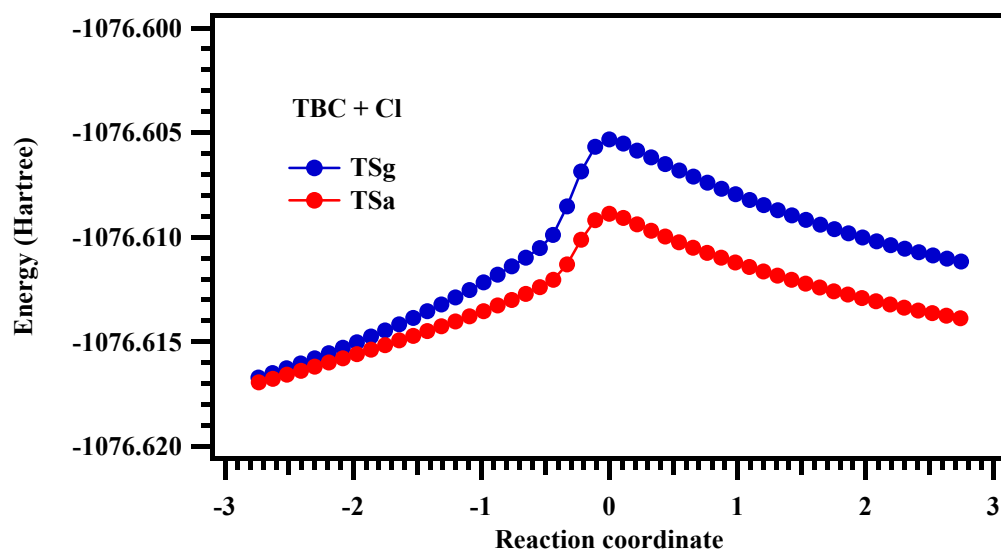

**Figure S3:** IRC plots for the reaction of TBC with Cl atoms at the MP2/6-311+G(d,p) level of theory.

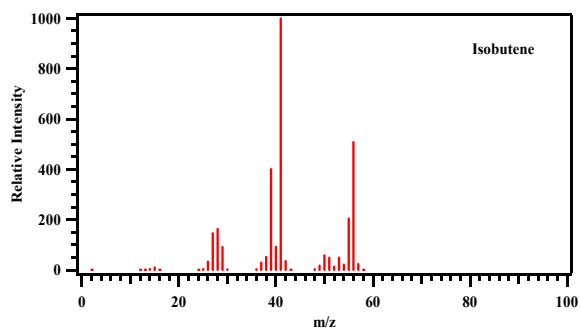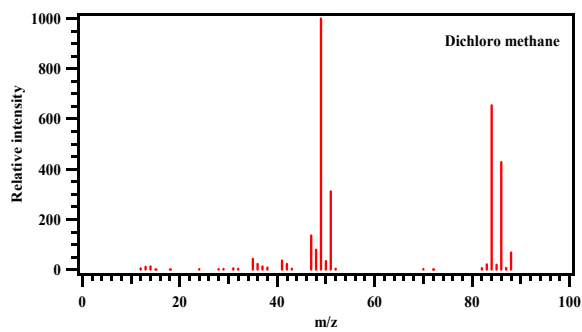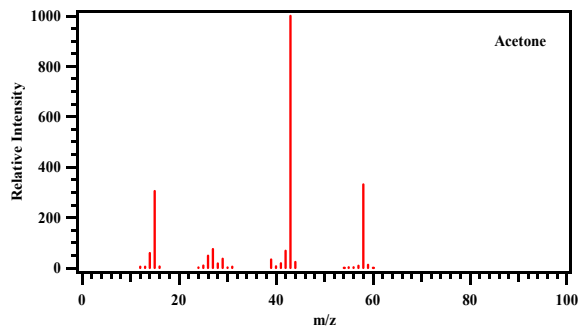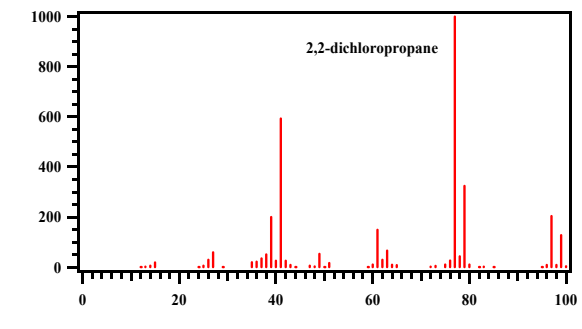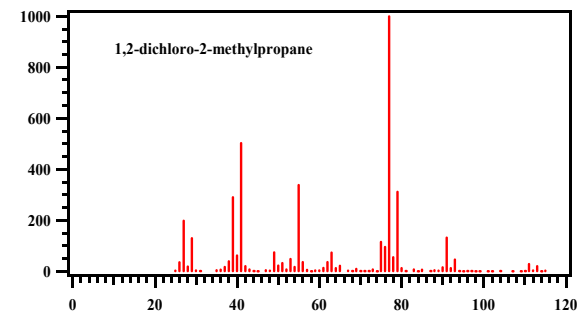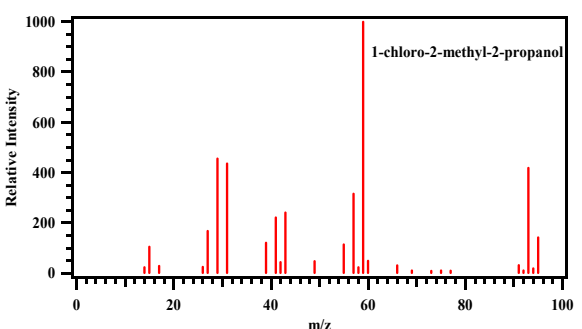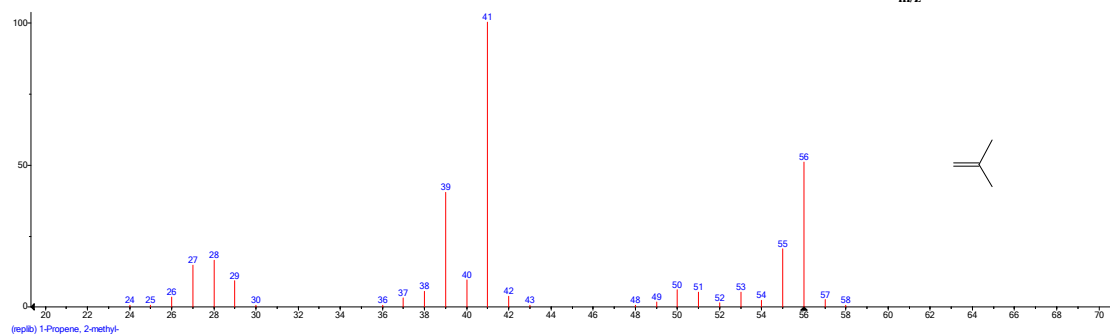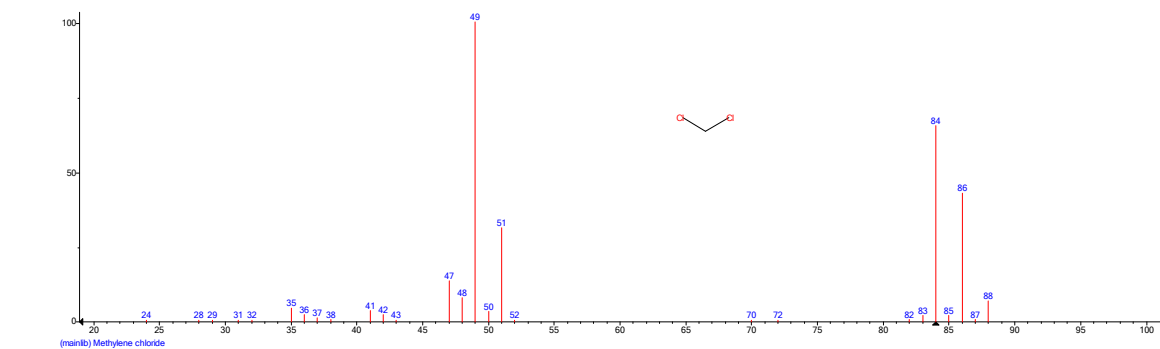

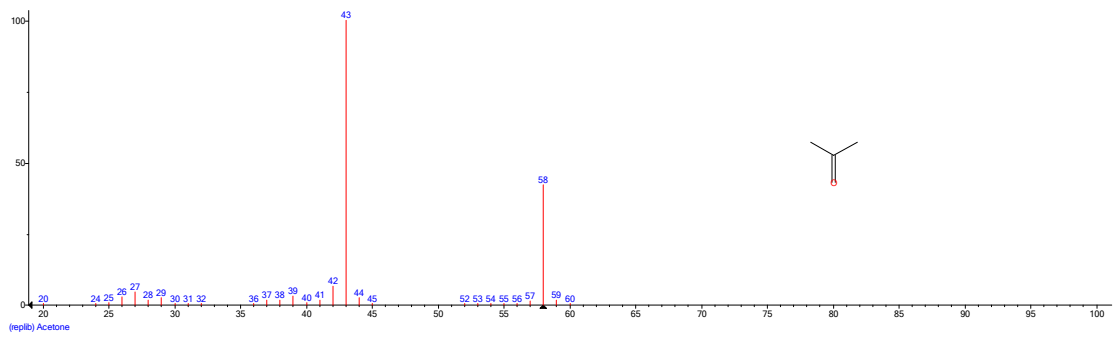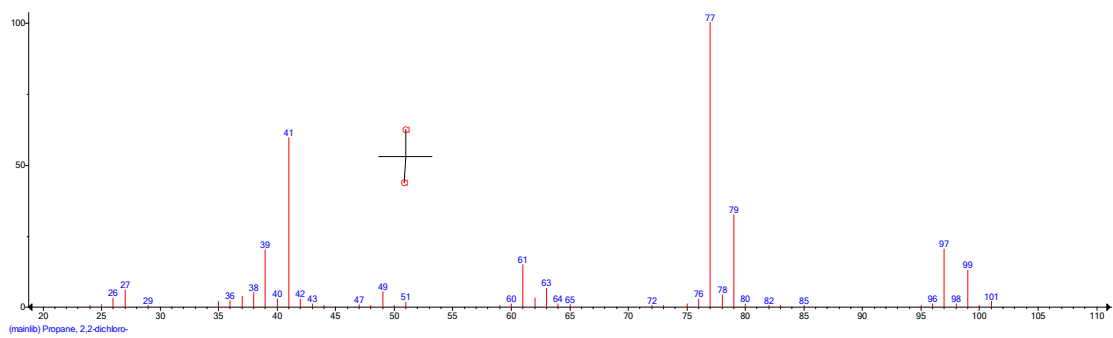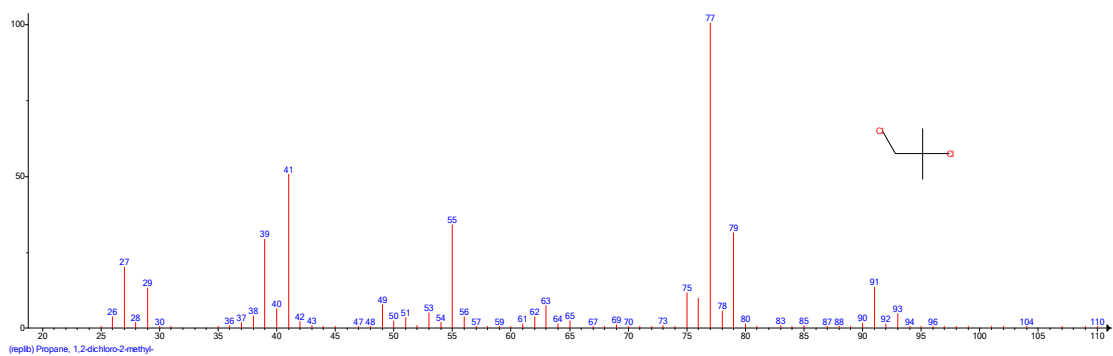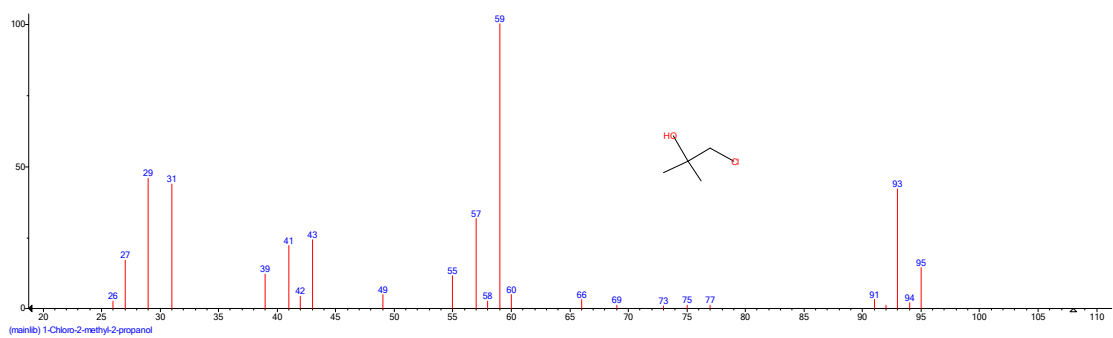

Figure S4: Mass spectra for all the detected products produced in the presence of O<sub>2</sub>.
